# Supplementary material for: Under-detection of blood culture-positive enteric fever cases: The impact of missing data and methods for adjusting incidence estimates
Source: PLoS Negl Trop Dis. 2020 Jan 16;14(1):e0007805. doi: 10.1371/journal.pntd.0007805 (PMC6964825; doi:10.1371/journal.pntd.0007805)
Supplement: S1 Code — R code for the analysis of fever presentation data (Fig 1A and 1B) (R) [file pntd.0007805.s004.R]

###----Voysey et al Under-detection of blood culture-positive enteric fever cases:----------------######
###-----------------the impact of missing data and methods for adjusting incidence estimates.-----######
####-----ANALYSIS OF PROBABILITY OF BLOOD CULTURE TAKING------------------------------------------######

#reproducing Figure 1A and 1B in paper---------------------------

require(ggplot2)
require(mgcv)
require(doBy)
require(cowplot)
theme_set(theme_cowplot())

fev<-read.csv("TyVACNepalPLoSNTD.csv")
fev$bloodtaken01<-as.numeric((fev$bloodtaken=="Yes"))

#-------days of fever + current temp 38 ---------------

c38.1<-fev[fev$current_temp38==1,]
c38.0<-fev[fev$current_temp38==0,]
tab1.0<-as.data.frame.matrix(table(c38.0$fever_days,c38.0$bloodtaken))
tab1.1<-as.data.frame.matrix(table(c38.1$fever_days,c38.1$bloodtaken))
tab1.0$total.0<-tab1.0$No+tab1.0$Yes
tab1.1$total.1<-tab1.1$No+tab1.1$Yes

tab1.0$prop.0<-tab1.0$Yes/tab1.0$total.0
tab1.1$prop.1<-tab1.1$Yes/tab1.1$total.1

tab1.0$weight.0<-sqrt(tab1.0$total.0)
tab1.1$weight.1<-sqrt(tab1.1$total.1)
tab1.0$fever_days<-as.numeric(rownames(tab1.0))
tab1.1$fever_days<-as.numeric(rownames(tab1.1))

#Figure 1B:-------------------------------------------------------------------------------------------
(p.temp<-ggplot(fev,aes(y=bloodtaken01, x=fever_days))+
  geom_smooth(data=fev[fev$current_temp38==1,],aes(y=bloodtaken01, x=fever_days),
              stat = 'smooth', color = 'grey30', fill="deepskyblue",  method='lm', se=TRUE)+
  geom_smooth(data=fev[fev$current_temp38==0,],aes(y=bloodtaken01, x=fever_days),
              stat = 'smooth', color = 'grey30', fill="deeppink", method = 'lm', se=TRUE, linetype = 4)+
  
  geom_point(data=tab1.1, aes(y=prop.1, x=fever_days, size=weight.1), shape = 21, colour="black", fill="darkblue")+
  geom_point(data=tab1.0, aes(y=prop.0, x=fever_days, size=weight.0), shape = 21, colour="black", fill="deeppink4")+
  scale_x_continuous(breaks=seq(0,7,1))+
  scale_y_continuous(breaks=seq(0,1,.2), limits=c(0,1.1))+
  labs(y="Proportion", x="Days of Fever")+
  annotate("text", x=2, y=1, label="Current temp >=38", colour="grey30")+
  annotate("text", x=5, y=.6, label="Current temp <38", colour="grey30")+
    guides(size=FALSE))


#Probability of having a blood culture - by age + clinical suspicion of typhoid----------------------
sus.1<-fev[fev$susp_typphoid=="Checked",]
sus.0<-fev[fev$susp_typphoid=="Unchecked",]
tab1.0<-as.data.frame.matrix(table(sus.0$fever_age_round,sus.0$bloodtaken))
tab1.1<-as.data.frame.matrix(table(sus.1$fever_age_round,sus.1$bloodtaken))

tab1.0$total.sus0<-tab1.0$No+tab1.0$Yes
tab1.1$total.sus1<-tab1.1$No+tab1.1$Yes

tab1.0$prop.sus0<-tab1.0$Yes/tab1.0$total.sus0
tab1.1$prop.sus1<-tab1.1$Yes/tab1.1$total.sus1

tab1.0$weight.sus0<-sqrt(tab1.0$total.sus0)
tab1.1$weight.sus1<-sqrt(tab1.1$total.sus1)

tab1.0$fever_age_round<-as.numeric(rownames(tab1.0))
tab1.1$fever_age_round<-as.numeric(rownames(tab1.1))

fev$susp_typhoid01<-(fev$susp_typphoid=="Checked")

#Figure 1A--------------------------------------------------
(p.susp<-ggplot(fev,aes(y=bloodtaken01, x=fever_age_round))+
  geom_smooth(data=fev[fev$susp_typhoid01==1,],aes(y=bloodtaken01, x=fever_age_round),
              stat = 'smooth', color = 'grey30', method = 'lm', se=TRUE, fill="deepskyblue")+
  geom_smooth(data=fev[fev$susp_typhoid01==0,],aes(y=bloodtaken01, x=fever_age_round),
              stat = 'smooth', color = 'grey30', method = 'lm',  se=TRUE, fill="deeppink",
              linetype = 4)+
  
  geom_point(data=tab1.1, aes(y=prop.sus1, x=fever_age_round, size=weight.sus1), shape = 21, colour="black", fill="darkblue")+
  geom_point(data=tab1.0, aes(y=prop.sus0, x=fever_age_round, size=weight.sus0), shape = 21, colour="black", fill="deeppink4")+
  scale_x_continuous(breaks=seq(0,15,1), labels=c(seq(0,14,1),"15+"))+
  scale_y_continuous(breaks=seq(0,1,.2), limits=c(0,1.1))+
  labs(y="Proportion", x="Age (Years)")+
  annotate("text", x=4, y=1, label="Typhoid suspected", colour="grey30")+
  annotate("text", x=10, y=.6, label="Typhoid not suspected", colour="grey30")+
  guides(size=FALSE))
